# Supplementary material for: Broadband near-perfect optical absorbers fabricated with complete spherical platinum shells with and without induced symmetry broken cracks using a simple colloidal route
Source: Royal Society of Chemistry journal article supplement (doi:10.1039/d3tc00578j), 2023-01-01
Supplement: d3tc00578j1.pdf [file d3tc00578j1.pdf]

## Supporting Information

# Broadband Near-Perfect Optical Absorbers Fabricated by Complete Spherical Platinum Shells with and without Induced Symmetry Broken Cracks Using a Simple Colloidal Route

Xiaoyu Liu, Ming Fu,\* Zhengjie Guo, Caixia Li, Zheli Wu, Dawei He, Yongsheng Wang

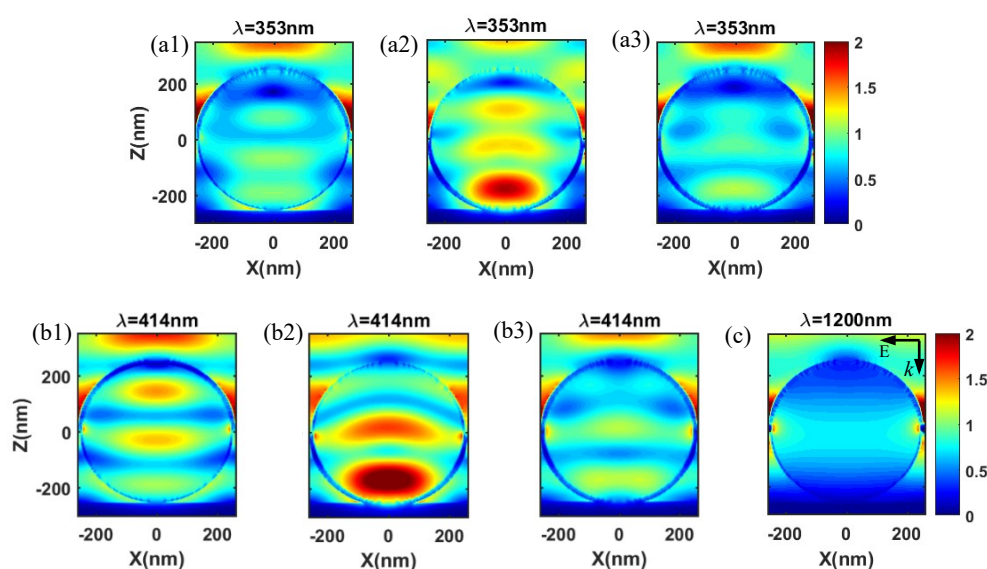

Fig. S1 (a-b) Electric field distributions of spherical based platinum shells of (1) upper hemispherical shell arrays, (2) lower hemispherical shell arrays, and (3) complete shell arrays at (a) 353 nm and (b) 414 nm. (c) Electric field distributions of upper hemispherical based platinum shells at 1200 nm.

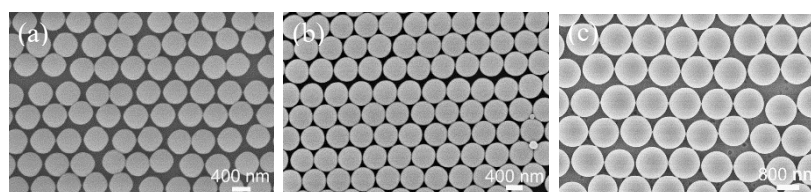

Fig. S2 Typical SEM images of (a)  $\text{TiO}_2$  spherical shells with 520 nm in diameter and in 1.2 nm oxide thickness; (b)  $\text{TiO}_2$  spherical shells with 520 nm in diameter and 3 nm in oxide thickness, (c)  $\text{Al}_2\text{O}_3$  spherical shells with 1000 nm in diameter and 3 nm in oxide thickness.

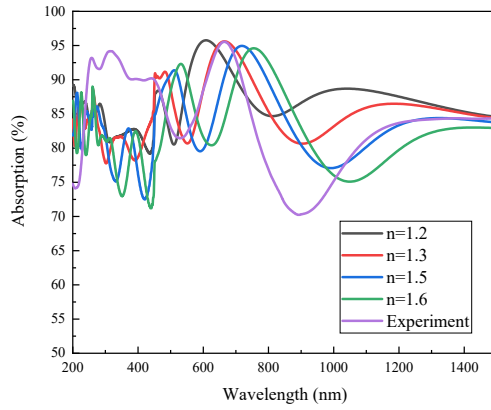

Fig. S3 The simulated spectra of platinum shell filled with different effective refractive index and the experimental spectrum. The effective refractive index is determined by the polymer remaining ratios inside the metallic shells.

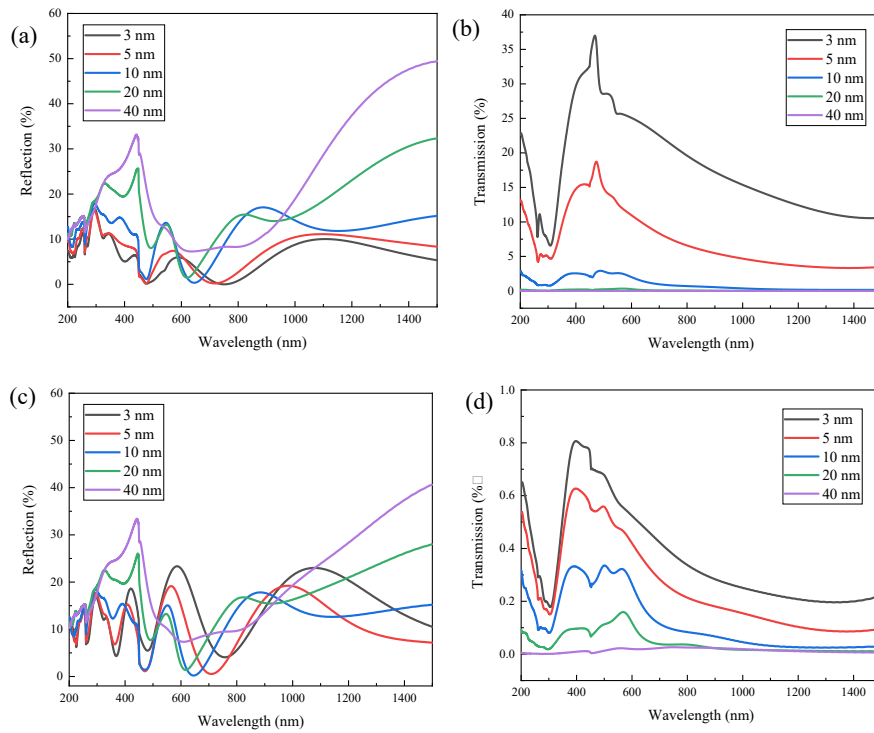

Fig. S4 (a-b) Simulated spectra of (a) reflection and (b) transmission of the spherical shell arrays in different platinum thickness without induced cracks using conformal platinum-coated substrate. (c-d) Simulated spectra of (c) reflection and (d) transmission of the spherical shell arrays in different platinum thickness without induced cracks using 50 nm platinum-deposited substrate.
